# Supplementary material
Source: PubMed Central journal article supplement (PMC2096712)

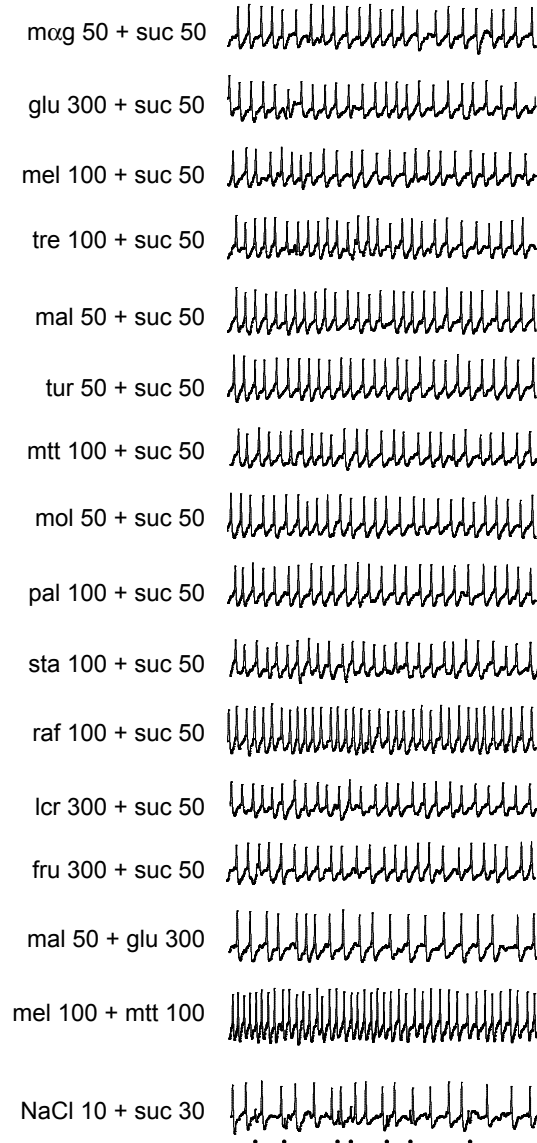

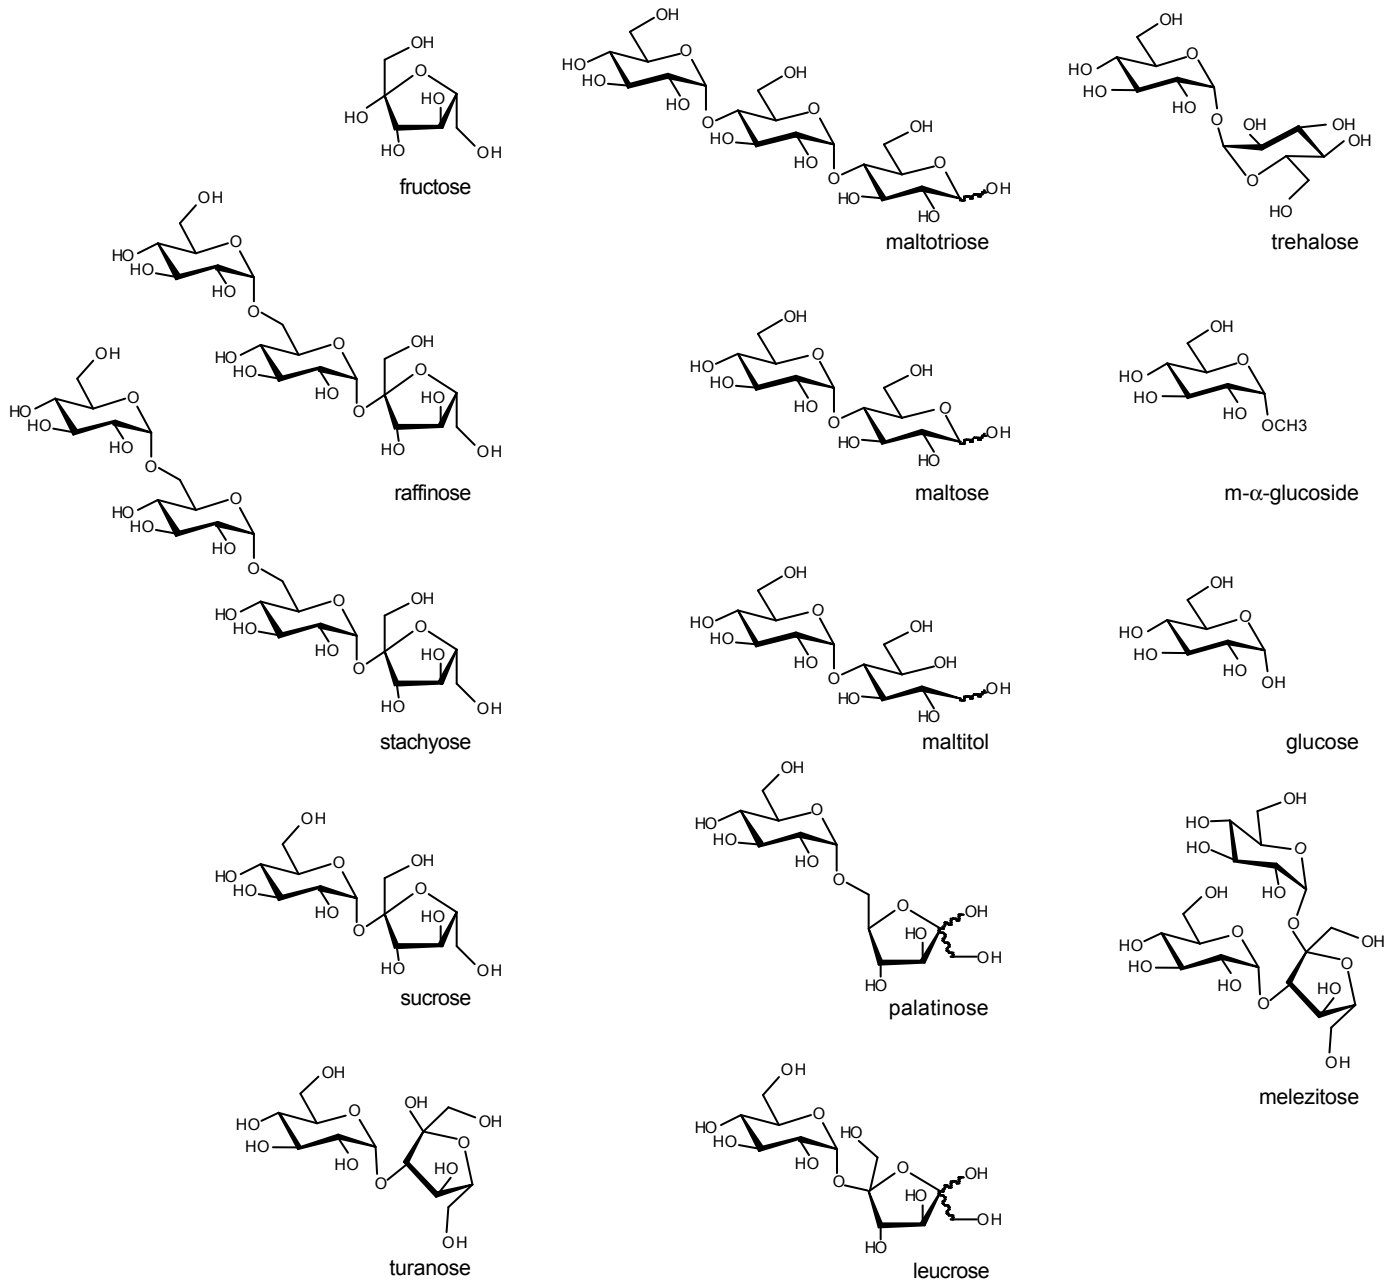

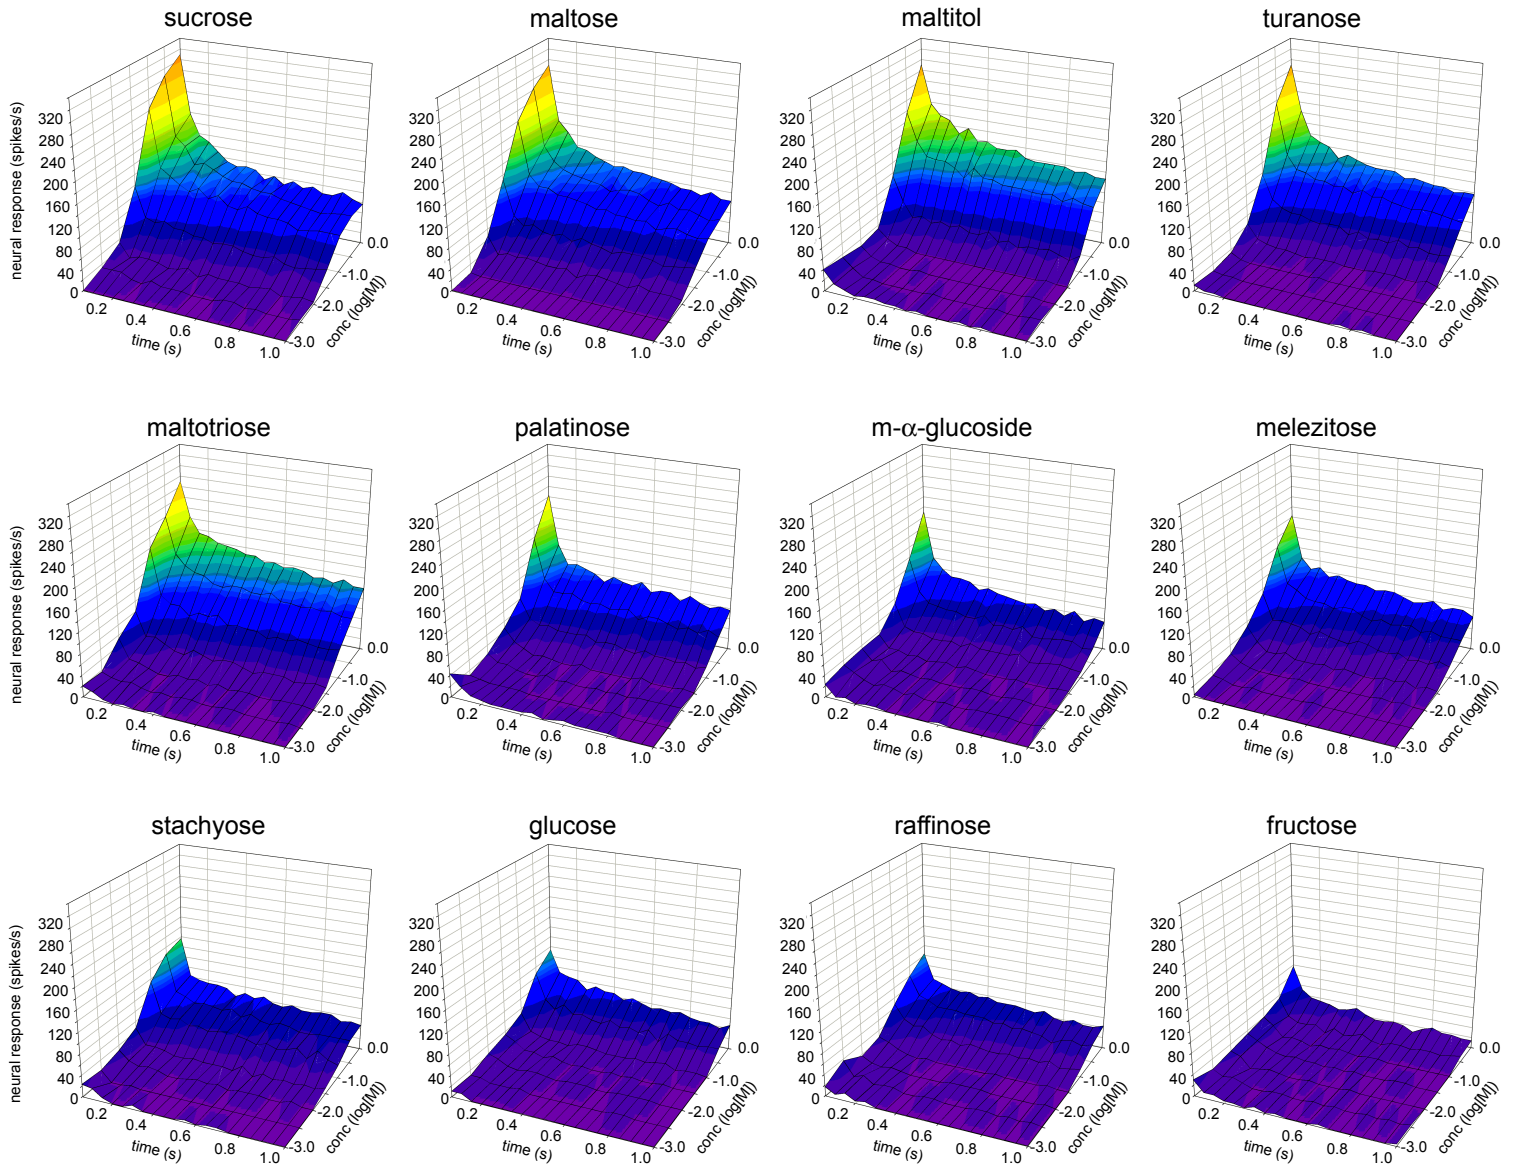

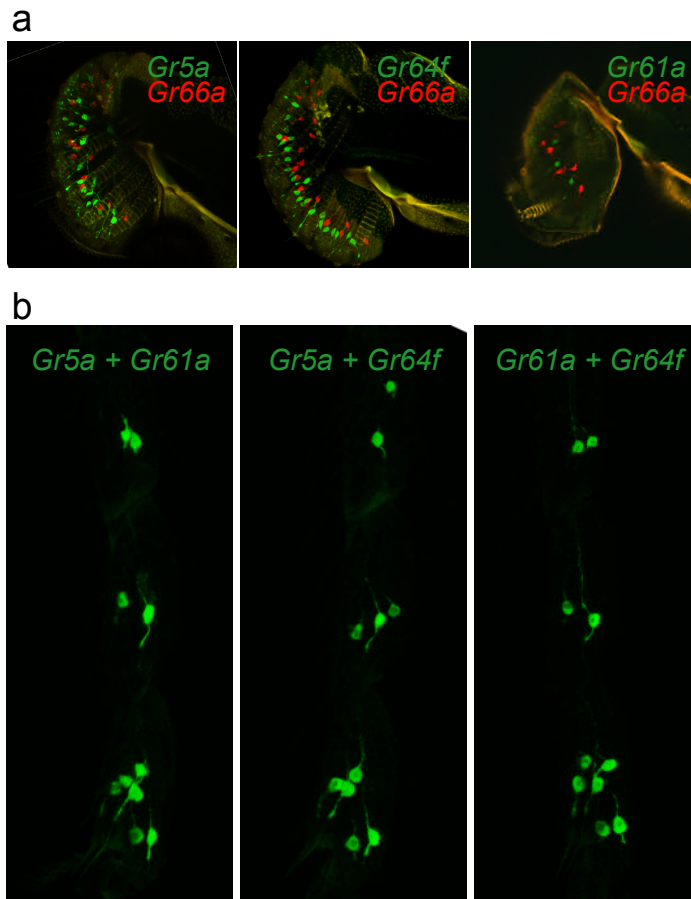

Supplement: NIHMS34124-supplement-01.pdf [file NIHMS34124-supplement-01.pdf]
